# Supplementary material
Source: ML conference proceedings conference paper supplement (https://openaccess.thecvf.com/content/cvpr_2017/html/Slavcheva_KillingFusion_Non-Rigid_3D_2017_CVPR_paper.html)
Supplement: Supplementary file 2 [file Slavcheva_KillingFusion_Non-Rigid_3D_2017_CVPR_supplemental.zip]

Archive with 2 entries (2 files):
- 0517-supp.pdf
- 0517-video.avi
